# Supplementary material for: Risk factors and biofilm formation analyses of hospital-acquired infection of Candida pelliculosa in a neonatal intensive care unit
Source: PubMed Central journal article supplement (PMC8244135; doi:10.1186/s12879-021-06295-1), 2021-06-29
Supplement: 12879_2021_6295_MOESM1_ESM.pdf [file 12879_2021_6295_MOESM1_ESM.pdf]

## **Risk factors and biofilm formation analyses of hospital-acquired infection of *Candida pelliculosa* in a neonatal intensive care unit**

Zhijie Zhang<sup>1</sup>, Yu Cao<sup>1</sup>, Yanjian Li<sup>2</sup>, Xufang Chen<sup>1</sup>, Chen Ding<sup>2</sup>, Yong Liu<sup>1\*</sup>

<sup>1</sup>Department of Laboratory Medicine of Shengjing Hospital of China Medical University, 36 Sanhao Street, Heping District, Shenyang, China.

<sup>2</sup>College of Life and Health Sciences, Northeastern University, 195, Chuangxin Road, Hunnan District, Shenyang, China.

\*Corresponding author:

Tel: +86-24-96615-72124

E-mail: [liuy@sj-hospital.org](mailto:liuy@sj-hospital.org) (Yong Liu)

Table S1 Clinical characteristic of patients with *Candida pelliculosa* fungemia

| No | Sex | Onset of candidemia (hospital day) | Ward | BW(g)/GA(WK) | AM | Apgar (1/5 min) | BSAU | PCBI                    | catheter tip culture | Inflammatory biomarker         |                                |                  |                  | MIC of Antifungal ( $\mu\text{g/ml}$ ) |       |          |            |       | Antifungal therapy | outcome |
|----|-----|------------------------------------|------|--------------|----|-----------------|------|-------------------------|----------------------|--------------------------------|--------------------------------|------------------|------------------|----------------------------------------|-------|----------|------------|-------|--------------------|---------|
|    |     |                                    |      |              |    |                 |      |                         |                      | WBC( $\times 10^9/\text{ml}$ ) | PLT( $\times 10^9/\text{ml}$ ) | CRP (mg/L)       | PCT (ng/ml)      | FA                                     | VRC   | 5-FC     | AMB        | ITR   |                    |         |
| 1  | M   | Oct 21,2017(21)                    | 2    | 1234/28      | 33 | 7/9             | Yes  | No                      | NG                   | 32.70 $\uparrow$               | 264                            | 10.10 $\uparrow$ | —                | 2                                      | 0.25  | $\leq 4$ | $\leq 0.5$ | 0.25  | FCA                | Sur     |
| 2  | F   | Nov 03,2017(22)                    | 1    | 1157/28      | 35 | 9/10            | Yes  | No                      | NG                   | 25.20 $\uparrow$               | 45 $\downarrow$                | 79.70 $\uparrow$ | 65.14 $\uparrow$ | 2                                      | 0.125 | $\leq 4$ | $\leq 0.5$ | 0.25  | FCA                | Sur     |
| 3  | M   | Nov 04,2017(42)                    | 2    | 810/27       | 31 | 4/8             | Yes  | No                      | NG                   | 14.05 $\downarrow$             | 84 $\downarrow$                | 94.70 $\uparrow$ | —                | 4                                      | 0.25  | $\leq 4$ | $\leq 0.5$ | 0.25  | FCA                | Sur     |
| 4  | F   | Nov 05,2017(10)                    | 2    | 1300/33      | 23 | 6/9             | Yes  | No                      | NG                   | 11.38 $\downarrow$             | 130                            | 9.86 $\uparrow$  | —                | 2                                      | 0.125 | $\leq 4$ | $\leq 0.5$ | 0.25  | FCA                | Sur     |
| 5  | F   | Nov 05,2017(23)                    | 1    | 846/28       | 37 | 5/9             | Yes  | No                      | CP                   | 9.19 $\downarrow$              | 156                            | 8.83 $\uparrow$  | 0.59 $\uparrow$  | 2                                      | 0.125 | $\leq 4$ | $\leq 0.5$ | 0.25  | FCA                | Sur     |
| 6  | M   | Nov 06,2017(18)                    | 2    | 928/29       | 36 | 2/7             | No   | No                      | NG                   | 13.83 $\downarrow$             | 312 $\uparrow$                 | 16.10 $\uparrow$ | —                | 2                                      | 0.125 | $\leq 4$ | $\leq 0.5$ | 0.125 | FCA                | Sur     |
| 7  | F   | Nov 05,2017(12)                    | 2    | 1208/31      | 33 | 7/9             | Yes  | No                      | NG                   | 6.46 $\downarrow$              | 111                            | 7.90             | 3.10 $\uparrow$  | 2                                      | 0.125 | $\leq 4$ | $\leq 0.5$ | 0.25  | FCA                | Sur     |
| 8  | M   | Nov 15,2017(42)                    | 2    | 823/27       | 38 | 4/7             | Yes  | No                      | CP                   | 15.81                          | 149                            | 2.17             | —                | 2                                      | 0.125 | $\leq 4$ | $\leq 0.5$ | 0.25  | FCA                | Sur     |
| 9  | M   | Nov 15,2017(22)                    | 2    | 1600/28      | 38 | 6/9             | No   | No                      | NG                   | 2.14 $\downarrow$              | 28 $\downarrow$                | 28.20 $\uparrow$ | —                | 2                                      | 0.25  | $\leq 4$ | $\leq 0.5$ | 0.25  | FCA                | Sur     |
| 10 | F   | Nov 16,2017(13)                    | 2    | 1170/32      | 35 | 7/9             | Yes  | No                      | CP                   | 3.20 $\downarrow$              | 85 $\downarrow$                | 7.48             | —                | 2                                      | 0.125 | $\leq 4$ | $\leq 0.5$ | 0.25  | FCA                | Sur     |
| 11 | M   | Nov 16,2017(29)                    | 1    | 3415/35      | 20 | 5/9             | Yes  | No                      | NG                   | 10.94 $\downarrow$             | 84 $\downarrow$                | 14.70 $\uparrow$ | 0.52 $\uparrow$  | 2                                      | 0.25  | $\leq 4$ | $\leq 0.5$ | 0.25  | FCA                | Sur     |
| 12 | F   | Nov 17,2017(11)                    | 2    | 970/29       | 37 | 6/8             | No   | No                      | NG                   | 11.26 $\downarrow$             | 202                            | 1.31             | —                | 4                                      | 0.25  | $\leq 4$ | $\leq 0.5$ | 0.25  | FCA                | Sur     |
| 13 | M   | Nov 21,2017(37)                    | 1    | 735/26       | 38 | 2/7             | Yes  | No                      | CP                   | 21.30 $\uparrow$               | 20 $\downarrow$                | 87.40 $\uparrow$ | 33.80 $\uparrow$ | 4                                      | 0.25  | $\leq 4$ | $\leq 0.5$ | 0.25  | FCA                | Sur     |
| 14 | F   | Nov 24,2017(19)                    | 1    | 1287/29      | 38 | 9/9             | Yes  | Yes                     | CP                   | 15.84                          | 132                            | 10.50 $\uparrow$ | 1.06 $\uparrow$  | 4                                      | 0.25  | $\leq 4$ | $\leq 0.5$ | 0.25  | FCA                | Sur     |
|    |     |                                    |      |              |    |                 |      | ( <i>Seipidemidis</i> ) |                      |                                |                                |                  |                  |                                        |       |          |            |       |                    |         |
| 15 | M   | Nov 24,2017(17)                    | 2    | 1226/28      | 40 | 6/8             | Yes  | No                      | CP                   | 3.98 $\downarrow$              | 60 $\downarrow$                | 9.50 $\uparrow$  | —                | 4                                      | 0.25  | $\leq 4$ | $\leq 0.5$ | 0.25  | FCA                | Sur     |
| 16 | F   | Nov 26,2017(32)                    | 2    | 700/26       | 31 | —               | Yes  | No                      | NG                   | 4.10 $\downarrow$              | 136                            | 17.30 $\uparrow$ | —                | 2                                      | 0.25  | $\leq 4$ | $\leq 0.5$ | 0.5   | FCA                | Sur     |
| 17 | M   | Dec 14,2017(18)                    | 1    | 1045/29      | 39 | 6/9             | Yes  | No                      | NG                   | 2.78 $\downarrow$              | 107                            | 13.10 $\uparrow$ | 0.59 $\uparrow$  | 2                                      | 0.125 | $\leq 4$ | $\leq 0.5$ | 0.25  | FCA                | Sur     |

|    |   |                 |   |         |    |      |     |    |    |       |      |        |       |   |       |    |      |      |     |     |
|----|---|-----------------|---|---------|----|------|-----|----|----|-------|------|--------|-------|---|-------|----|------|------|-----|-----|
| 18 | M | Dec 14,2017(19) | 2 | 1420/31 | 30 | 3/8  | Yes | No | NG | 6.19↓ | 159  | 10.70↑ | —     | 2 | 0.125 | ≤4 | ≤0.5 | 0.25 | FCA | Sur |
| 19 | M | Feb 17,2018(33) | 1 | 955/28  | 30 | 3/9  | Yes | No | NG | 7.03↓ | 381↑ | 1.07   | —     | 2 | 0.125 | ≤4 | ≤0.5 | 0.25 | FCA | Sur |
| 20 | M | Aug 31,2018(22) | 1 | 1214/32 | 36 | 8/10 | Yes | No | CP | 3.58↓ | 91↓  | 14.40↑ | 0.39  | 2 | 0.125 | ≤4 | ≤0.5 | 0.25 | FCA | Sur |
| 21 | M | Sep 28,2018(10) | 1 | 1117/26 | 31 | 5/9  | Yes | No | NG | 10.0↓ | 103  | 7.24   | 0.50↑ | 2 | 0.125 | ≤4 | ≤0.5 | 0.25 | VRC | Sur |

M=male, F=female, BW=birth weight, GA=gestational age (WK), AM=age of mother, BSAU=Broad spectrum antibiotics use before fungemia, PCBI=Previous or concomitant

bacteremic infection, NG= no growth, CP=*C. pelliculosa*, WBC=white blood cell, PLT= platelet, CRP=C reaction protein, PCT=procalcitonin ↑increased than reference

range↑decreased than reference range, Sur=survival, FCA= fluconazole, VRC= voriconazole, 5-FC=5-fluorocytosine, AMB=amphotericin B, ITR=itraconazole.
